# Supplementary material for: Association between Polymorphism in the Janus Kinase 2 (JAK2) Gene and Selected Performance Traits in Cattle and Sheep
Source: MDPI journal article supplement (doi:10.3390/ani13152470), 2023-07-31
Supplement: s1 [file s1]

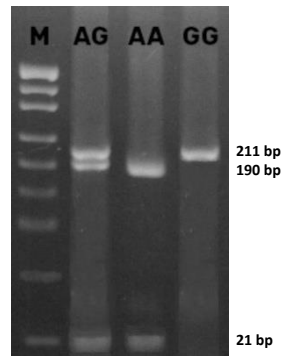

Figure S1. Electrophoretic separation of restriction fragments resulting from digestion with the *RsaI* restriction enzyme (ACRS-PCR; bovine *JAK2/e16/RsaI* polymorphism); lane 1 (M) - mass standard pUC19 DNA/*MspI*; lane 2 - AG genotype; lane 3 - AA genotype; lane 4 - GG genotype.

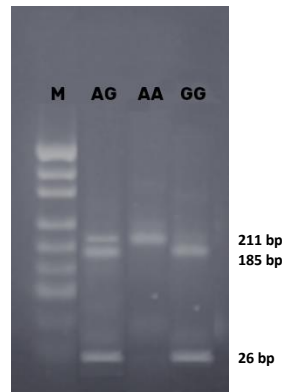

Figure S2. Electrophoretic separation of restriction fragments resulting from digestion with the *HaeIII* restriction enzyme (ACRS-PCR; bovine *JAK2/e23/HaeIII* polymorphism); lane 1 (M) - mass standard pUC19 DNA/*MspI*; lane 2 - AG genotype; lane 3 - AA genotype; lane 4 - GG genotype.

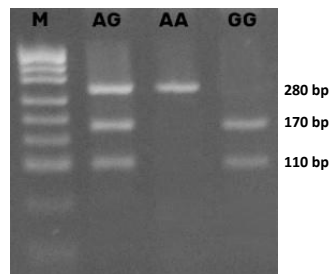

Figure S3. Electrophoretic separation of restriction fragments resulting from digestion with the *EarI* restriction enzyme (PCR-RFLP; ovine *JAK2/e6/EarI* polymorphic site); lane 1 (M) - mass standard pUC19 DNA/*MspI*; lane 2 - AG genotype; lane 3 - AA genotype; lane 4 - GG genotype.

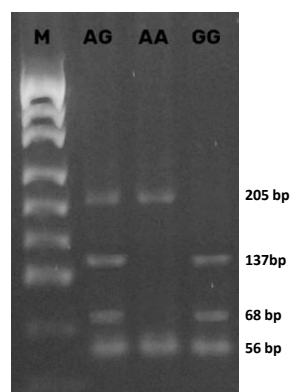

Figure S4. Electrophoretic separation of restriction fragments resulting from digestion with the *Hpy188III* restriction enzyme (PCR-RFLP; ovine *JAK2/e24/Hpy188III* polymorphism); lane 1 (M) - mass standard pUC19 DNA/*MspI*; lane 2 - AG genotype; lane 3 - AA genotype; lane 4 - GG genotype.
