# Supplementary material for: Association between Polymorphism in the Janus Kinase 2 (JAK2) Gene and Selected Performance Traits in Cattle and Sheep
Source: MDPI journal article supplement (doi:10.3390/ani13152470), 2023-07-31
Supplement: s1 [file s1]

Table S1 A summary of the *JAK2* gene fragments used for DNA sequencing and subsequent identification of polymorphic sites

| Primer (5' > 3')                            | Tm (°C) | Product size (bp) | sequence                                                                                     | possible SNP                                  | status                                           |
|---------------------------------------------|---------|-------------------|----------------------------------------------------------------------------------------------|-----------------------------------------------|--------------------------------------------------|
| LEFT PRIMER<br>gaaggataacttaccagtgtcactttc  | 59.90   | 352               | <i>Bos taurus</i> exon 3 (highlighted in blue)                                               | rs377943180<br>synonymous<br>A>G<br>p.Glu12   | not detected                                     |
|                                             |         |                   | 1 atgctatcag tgaagacttc tttatatatg <b>aaggataact</b> <b>taccagtgtc</b> <b>acttttc</b> atatt  | rs458668038<br>synonymous<br>T>G<br>p.Leu43   | not detected                                     |
|                                             |         |                   | 61 gtaactgggt tctcttacag gcaaatgttc tgaaaacgac tctgc <b>atggg</b> aatggcttgc                 |                                               |                                                  |
|                                             |         |                   | 121 <b>cttacaatga</b> cagaaatgga <b>A</b> ggaacatcc acatccoctg tacatcagaa tggatgatatt        | rs463147606<br>synonymous<br>T>C<br>p.Tyr44   | not detected                                     |
| RIGHT PRIMER<br>aaaccaagcatatgttaataagaagaa | 58.07   |                   | 181 tctggaaatg ctaactctgt gaagcaaata gatccagtcc tacagggtcta tct <b>TtaT</b> cat              |                                               |                                                  |
|                                             |         |                   | 241 tcccttgga acgctgaggg ggattatctg cagtttctaa <b>cT</b> ggagagta tgttgctgaa                 |                                               |                                                  |
|                                             |         |                   | 301 gagatctgta ttgctgcttc taaagcttgt ggtaagtatt aaaaaacagt gttt <b>ttcttc</b>                |                                               |                                                  |
|                                             |         |                   | 361 <b>ttattaacat atgcttggtt</b> tattatactc taacacaatg tacctgtgta a                          |                                               |                                                  |
| LEFT PRIMER<br>gggccctggacatactaagt         | 60.75   | 265               | <i>Bos taurus</i> exon 16 (highlighted in green)                                             | rs383317698<br>synonymous<br>T>G<br>p.Thr59   | not detected                                     |
|                                             |         |                   | 1 <b>gggccctgga cactactaagt</b> gctcaaatat ttgtgggtta atatttgaat gtttatgcaa                  | rs210330018<br>synonymous<br>C>T<br>p.Cys675  | not detected                                     |
|                                             |         |                   | 61 ttaatttttaa tag <b>gaagaaa</b> aaacccttat tcatgggaat gtgtg <b>cgcca</b> aaaatattct        |                                               |                                                  |
| RIGHT PRIMER<br>cctctttcaagcaaaggtt         | 58.44   |                   | 121 <b>tcttatcaga</b> gaagaagaca ggaagacagg aaatcctcct <b>ttcatcaaac</b> <b>ttagtgatcc</b>   | rs210148032<br>missense<br>A>G<br>p.Ile704Val | detected and described as <i>JAK2/e16/RsaI</i>   |
|                                             |         |                   | 181 <b>tggcattagt</b> <b>A</b> ttacagttt tgccaaaaga <b>ca</b> gtaagtcc aacaggaatc aaatttaact |                                               |                                                  |
|                                             |         |                   | 241 ttatt <b>aacct ttgcttgga agagg</b> tataa aaatcatgct gttaattttt ctcaaacact                |                                               |                                                  |
| LEFT PRIMER<br>aatcaagagttggcacatcaa        | 59.61   | 222               | <i>Bos taurus</i> exon 23 (highlighted in dark grey)                                         | rs461568961<br>synonymous<br>G>T<br>p.Leu1044 | not detected                                     |
|                                             |         |                   | 1 ggta <b>aaatca agagttggca catca</b> agtaa ctctttttaaa tatattacag <b>g</b> tatgcacca        | rs211067160<br>synonymous<br>A>G<br>p.Pro1057 | detected and described as <i>JAK2/e23/HaeIII</i> |
|                                             |         |                   | 61 <b>gaatcactga</b> cagagagcaa gttttctgtg gcttcagatg tttggagctt <b>tg</b> gagtgggt          |                                               |                                                  |
| RIGHT PRIMER<br>tcgaaacgcttttctcatgtt       | 59.87   |                   | 121 <b>ctG</b> atgaac ttttcacata tattgacaag agtaaaagcc <b>cA</b> ccagcgt cagtatgctt          |                                               |                                                  |
|                                             |         |                   | 181 tttgtttact ttcaattttt ttttt <b>aacat gagaaaaagcg tt</b> tcgaaaga ataatagtaa              |                                               |                                                  |

| Primer (5' > 3')                               | Tm (°C) | Product size (bp)                                                                                         | sequence                                                                                                        | possible SNP                                    | status                                              |
|------------------------------------------------|---------|-----------------------------------------------------------------------------------------------------------|-----------------------------------------------------------------------------------------------------------------|-------------------------------------------------|-----------------------------------------------------|
| Ovis aries exon 6 (highlighted in pink)        |         |                                                                                                           |                                                                                                                 |                                                 |                                                     |
| LEFT PRIMER<br>ttgacctgttaaattgtatatgttctg     | 57.85   | 280                                                                                                       | 1 gag <b>ttgacct tgttaaattgt atatgttctg</b> aaaattatgc tatagattaa aatataataa                                    | rs160146162<br>synonymous<br>A>G<br>p.Glu177    | detected and described as<br>JAK2/e6/Earl           |
|                                                |         |                                                                                                           | 61 tagattaaaa tgtgatagtg aaacttaagt attttcttct atattttgtt tttacttttag                                           |                                                 |                                                     |
| RIGHT PRIMER<br>ttgcataagaaaattacctgatagagc    | 60.36   |                                                                                                           | 121 <b>tggcggcatg attttttaca tggatggata aaagtacccg tgactcatga aacacaggaa</b>                                    | rs160146160<br>synonymous<br>G>A<br>p.Thr196    | detected and described as<br>JAK2/e6/seq            |
|                                                |         |                                                                                                           | 181 <b>ga<b>A</b>tgtcttg ggatggcagt gttagatatg atgagaatag ccaaagaaaa gaatcaaac<b>G</b></b>                      |                                                 |                                                     |
|                                                |         | 241 <b>ccactggaca tctatag<b>gctc</b> <b>tatcaggtaa</b> <b>ttttcttatg</b> <b>caa</b>atccata tgagtatgac</b> |                                                                                                                 |                                                 |                                                     |
| Ovis aries exon 12 (highlighted in light grey) |         |                                                                                                           |                                                                                                                 |                                                 |                                                     |
| LEFT PRIMER<br>ctcagtgtgttttgatttatgtata       | 54.71   | 253                                                                                                       | 1 <b>ctcagtgtgt tttgatttta t<b>gtata</b></b> tttt ttcattcatt ctatcctttt tttaaacaga                              | rs592691324<br>missense<br>G>C<br>p.Asp519His   | not detected                                        |
|                                                |         |                                                                                                           | 61 caaatcaaac cttctagtct tcagaaccaa tgggtgtttct <b>G</b> atgtaccaa cctcaccaac                                   |                                                 |                                                     |
| RIGHT PRIMER<br>gggtagaaaatgaagaacagttg        | 57.01   |                                                                                                           | 121 <b>tttacaagg cataataa<b>T</b>g</b> tgaaccaaat ggtgttccac aaaattagaa <b>atgaagattt</b>                       | rs1094682814<br>missense<br>T>G<br>p.Asn531Lys  | not detected                                        |
|                                                |         |                                                                                                           | 181 <b>ggtatttgta agtcaataga tgctgattat tgcctttttg tcttttttaa</b> <b>caactgttct</b>                             |                                                 |                                                     |
|                                                |         | 241 <b>tcattttcta ccc</b>                                                                                 |                                                                                                                 |                                                 |                                                     |
| Ovis aries exon 13 (highlighted in yellow)     |         |                                                                                                           |                                                                                                                 |                                                 |                                                     |
| LEFT PRIMER<br>ggacatatctcctaattcccaca         | 59.11   | 220                                                                                                       | 1 <b>tt<b>ggacatat</b> <b>ttcctaattc</b> <b>ccaca</b></b> ttttt ttccatcctt aatcattctt tctttttttt                | rs416867672<br>missense<br>A>G<br>p.Ile563Met   | not detected                                        |
|                                                |         |                                                                                                           | 61 <b>tttttttttt ttttggttaa ag<b>aatgaaag</b> <b>ccttggccaa</b> <b>ggaactttta</b> <b>caaaaatttt</b></b>         |                                                 |                                                     |
| RIGHT PRIMER<br>caaacctctgaatagtttctatgtgc     | 59.66   |                                                                                                           | 121 <b>taaaggtat<b>A</b> agaagagaaa taggagac<b>Ta</b> tggtcagctg catgaaacag aagttctttt</b>                      | rs1086855307<br>missense<br>T>C<br>p.Tyr570His  | not detected                                        |
|                                                |         |                                                                                                           | 181 <b>aaaagttctg gataaa<b>gcac</b> <b>atagaaacta</b> <b>ttcagaggtt</b> <b>tg</b></b> tatatattct ttatataatt     |                                                 |                                                     |
| Ovis aries exon 24 (highlighted in red)        |         |                                                                                                           |                                                                                                                 |                                                 |                                                     |
| LEFT PRIMER<br>tctgcttgaaattaaatgtaccaa        | 59.17   | 261                                                                                                       | 1 ttgagaatt <b>c</b> <b>tgcttgaaat</b> <b>taa<b>at</b>gtacc</b> <b>aaa</b> aatatgt cattgaaaag tgggtttgcg        | rs160146116<br>synonymous<br>A>G<br>p.Leu1082   | detected and described as<br>JAK2/e24/<br>Hpy188III |
|                                                |         |                                                                                                           | 61 tttcag <b>gaat</b> <b>ttatgcgtat</b> <b>gattggcaat</b> <b>gacaaacaag</b> <b>gacagatgat</b> <b>cgtgtttcat</b> |                                                 |                                                     |
| RIGHT PRIMER<br>tcagtgaactgcataaactgacc        | 59.30   |                                                                                                           | 121 <b>ttgatagaac tcct<b>A</b>aagaa taatggaaga ttac<b>C</b>gagac cagatggatg cccagatgag</b>                      | rs1094390234<br>missense<br>C>T<br>p.Pro1089Leu | not detected                                        |
|                                                |         |                                                                                                           | 181 gtaacaaaaa ttttttttat ccacagtaat catgcatttt ctttctcttt ttaccaag                                             |                                                 |                                                     |
|                                                |         | 241 atttc <b>ggtc agtttatgca gttcactga</b> a ct                                                           |                                                                                                                 |                                                 |                                                     |
|                                                |         |                                                                                                           |                                                                                                                 | rs429445187<br>intronic<br>A>G                  | detected                                            |
